# Supplementary material for: Tracking the gastrointestinal digestive and metabolic behaviour of Dendrobium officinale polysaccharides by fluorescent labelling
Source: Royal Society of Chemistry journal article supplement (doi:10.1039/d2fo01506d), 2022-01-01
Supplement: d2fo01506d1.pdf [file d2fo01506d1.pdf]

## Supplementary Information

### **Gastrointestinal digestive and metabolic behavior of *Dendrobium***

#### ***officinale* polysaccharide tracked by fluorescent labeling**

Zhijing Wu<sup>a,b</sup>, Yu Zhang<sup>a, b</sup>, Gang Nie<sup>c</sup>, Junxi Liu<sup>a,b</sup>, Hao Mei<sup>a,b</sup>, Zihao He<sup>a,b</sup>, Pengfei Dou<sup>c</sup>, Kaiping Wang<sup>c\*</sup>.

<sup>a</sup>*Department of Pharmacy, Union Hospital, Tongji Medical College, Huazhong University of Science and Technology, 430030 Wuhan, China*

<sup>b</sup>*Hubei Province Clinical Research Center for Precision Medicine for Critical Illness, 430030 Wuhan, PR China*

<sup>c</sup>*Hubei Key Laboratory of Nature Medicinal Chemistry and Resource Evaluation, Tongji Medical College of Pharmacy, Huazhong University of Science and Technology, 430030 Wuhan, China*

\*Corresponding author.

E-mail address: [wkpzcq@163.com](mailto:wkpzcq@163.com)

### 1. The effect of trifluoroacetic on FDOP detected by HPGPC-FLD

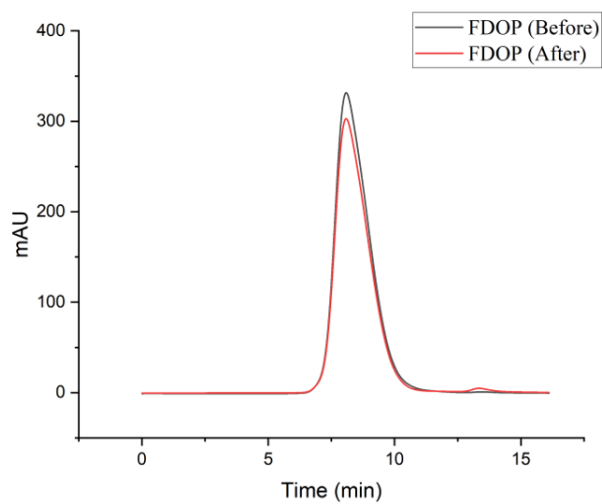

**Fig. S1** The effect of trifluoroacetic on FDOP detected by HPGPC-FLD
